# Supplementary material for: Time Trends in the Incidence of Spinal Pain in China, 1990 to 2019 and Its Prediction to 2030: The Global Burden of Disease Study 2019
Source: PubMed Central journal article supplement — Pain Ther. 2022 Aug 12;11(4):1245–66. doi: 10.1007/s40122-022-00422-9 (PMC9633916; doi:10.1007/s40122-022-00422-9), 2022-08-12
Supplement: 40122_2022_422_MOESM1_ESM.pdf [file 40122_2022_422_MOESM1_ESM.pdf]

**Title page**

**Title:** Time trends in the incidence of spinal pain in China, 1990 to 2019 and its prediction to 2030:

The Global Burden of Disease Study 2019

**Authors and affiliations:**

Jiehua Wei<sup>1</sup>, Lizhang Chen<sup>1</sup>, Shengbin Huang<sup>2</sup>, Ying Li<sup>2</sup>, Jingmao Zheng<sup>2</sup>, Zhilin Cheng<sup>2</sup>, Zhaolin

Xie<sup>2</sup>

<sup>1</sup>Department of Epidemiology and Health Statistics, Xiangya School of Public Health, Central South

University, Hunan, China

<sup>2</sup>Department of Orthopedics, Guigang People's Hospital, Guigang, China

**\*Corresponding to**

Zhaolin Xie, Department of Orthopedics, Guigang People's Hospital, Guigang, 537100 Guangxi,

China

**E-mail:** xiezhaolinx@126.com

## **Appendix. Supplementary data**

**Supplementary Fig. S1** Time series autocorrelation of LBP in males.

**Supplementary Fig. S2** Time series partial autocorrelation of LBP in males.

**Supplementary Fig. S3** Time series autocorrelation of LBP in females.

**Supplementary Fig. S4** Time series partial autocorrelation of LBP in females.

**Supplementary Fig. S5** Autocorrelation functions (ACF) and partial autocorrelation functions (PACF) of model residuals for LBP incidences in males.

**Supplementary Fig. S6** Autocorrelation functions (ACF) and partial autocorrelation functions (PACF) of model residuals for LBP incidences in females.

**Supplementary Fig. S7** Time series autocorrelation of NP in males.

**Supplementary Fig. S8** Time series partial autocorrelation of NP in males.

**Supplementary Fig. S9** Time series autocorrelation of NP in females.

**Supplementary Fig. S10** Time series partial autocorrelation of NP in females.

**Supplementary Fig. S11** Autocorrelation functions (ACF) and partial autocorrelation functions (PACF) of model residuals for NP incidences in males.

**Supplementary Fig. S12** Autocorrelation functions (ACF) and partial autocorrelation functions (PACF) of model residuals for NP incidences in females.

**Supplementary Table S1.** ARIMA (0,2,1) Model Parameters for LBP in males.

**Supplementary Table S2.** ARIMA (1,2,1) Model Parameters for LBP in females.

**Supplementary Table S3.** ARIMA (3,1,0) Model Parameters for NP in males.

**Supplementary Table S4.** ARIMA (2,1,1) Model Parameters for NP in females.

**Supplementary Fig. S1** Time series autocorrelation of LBP in males.

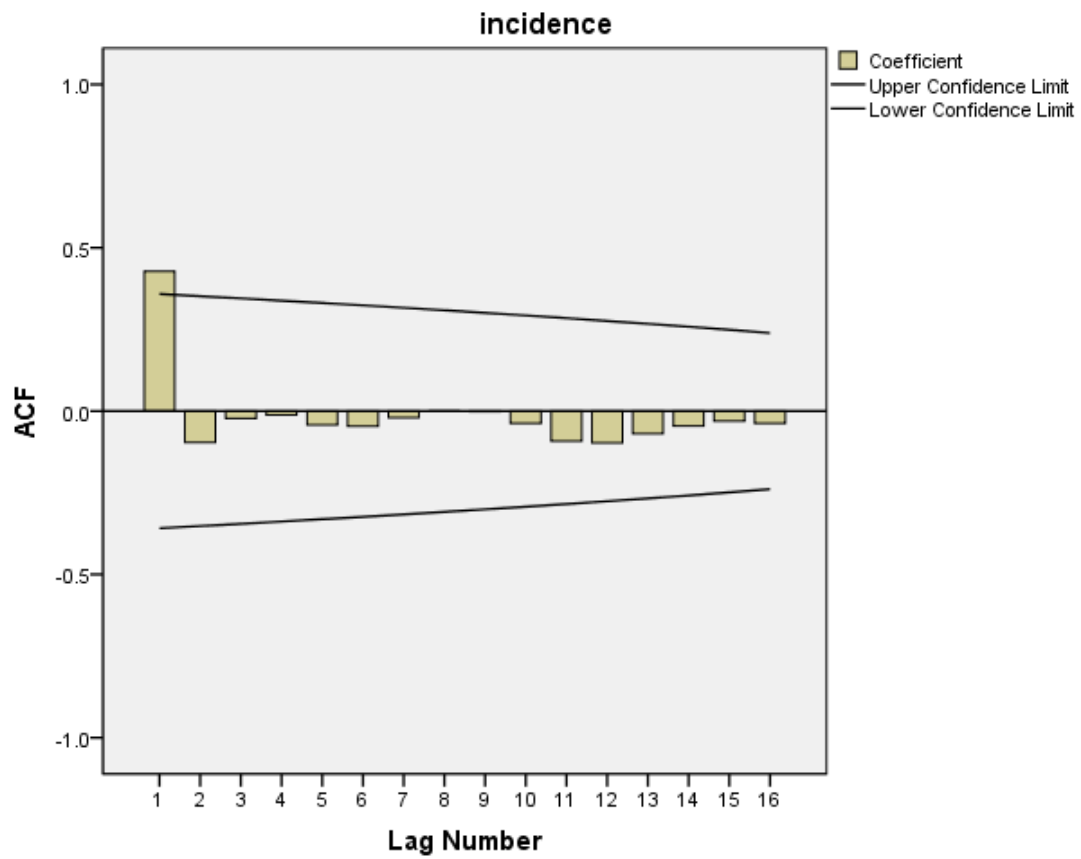

**Supplementary Fig. S2** Time series partial autocorrelation of LBP in males.

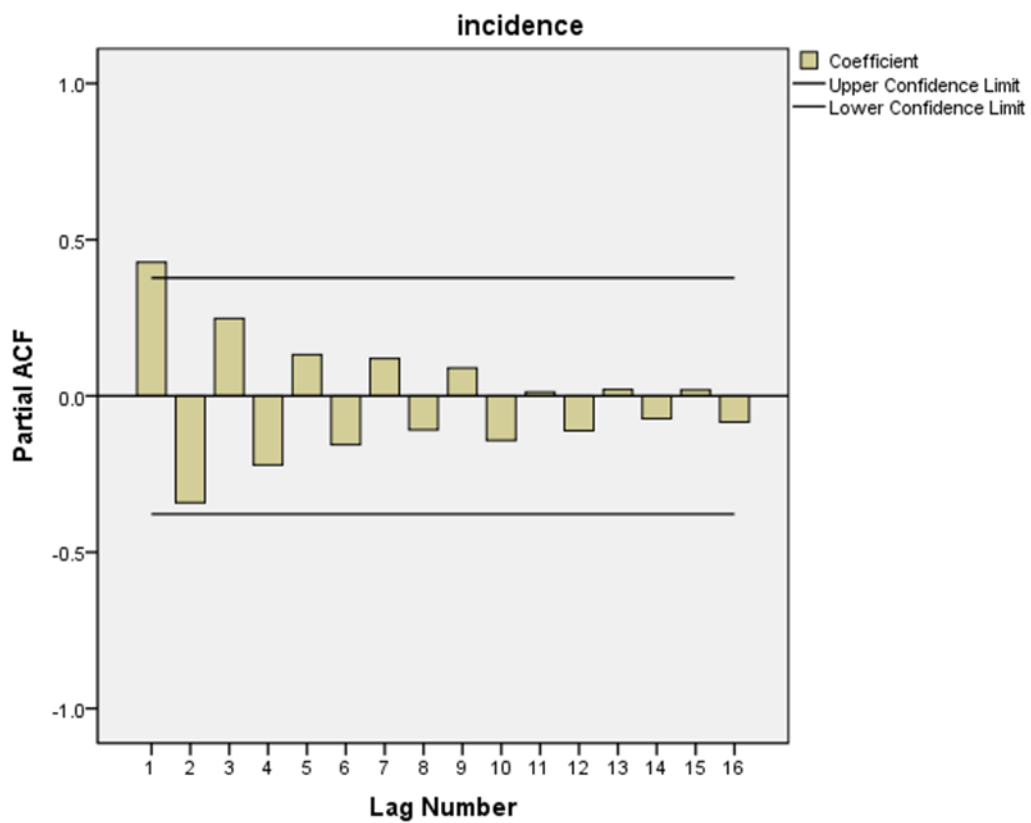

Supplementary Fig. S3 Time series autocorrelation of LBP in females.

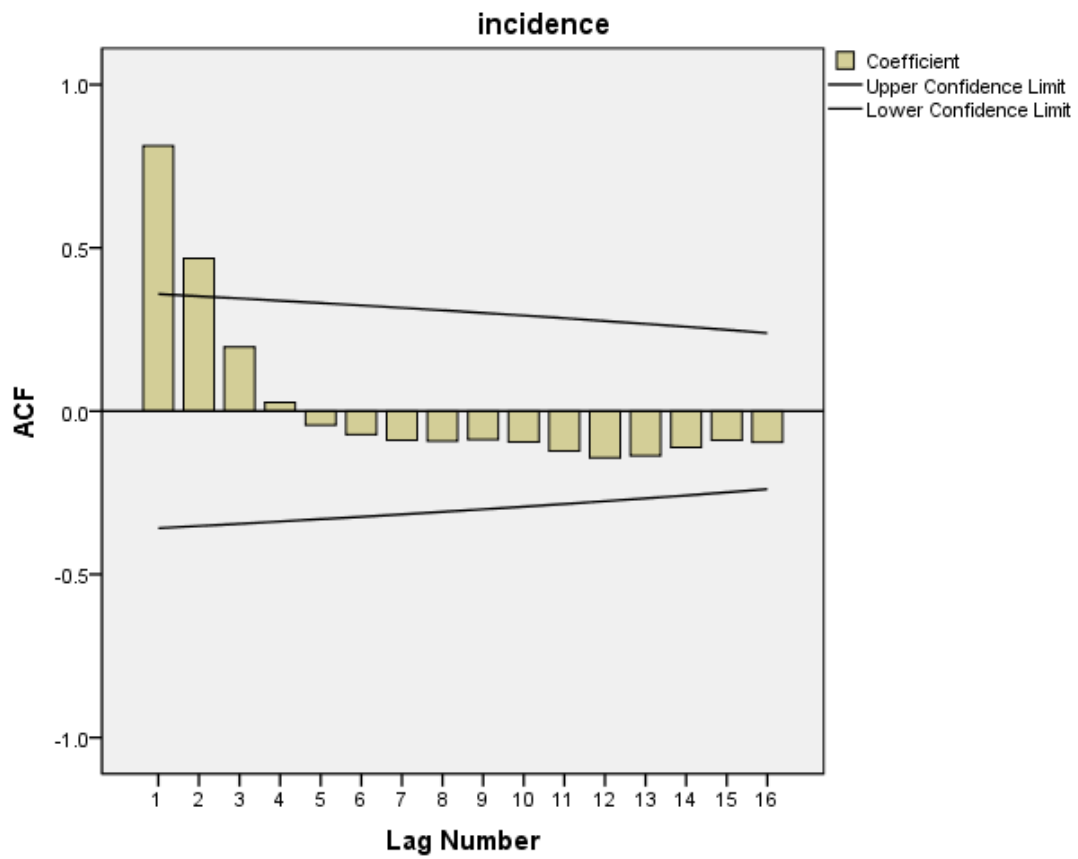

Supplementary Fig. S4 Time series partial autocorrelation of LBP in females.

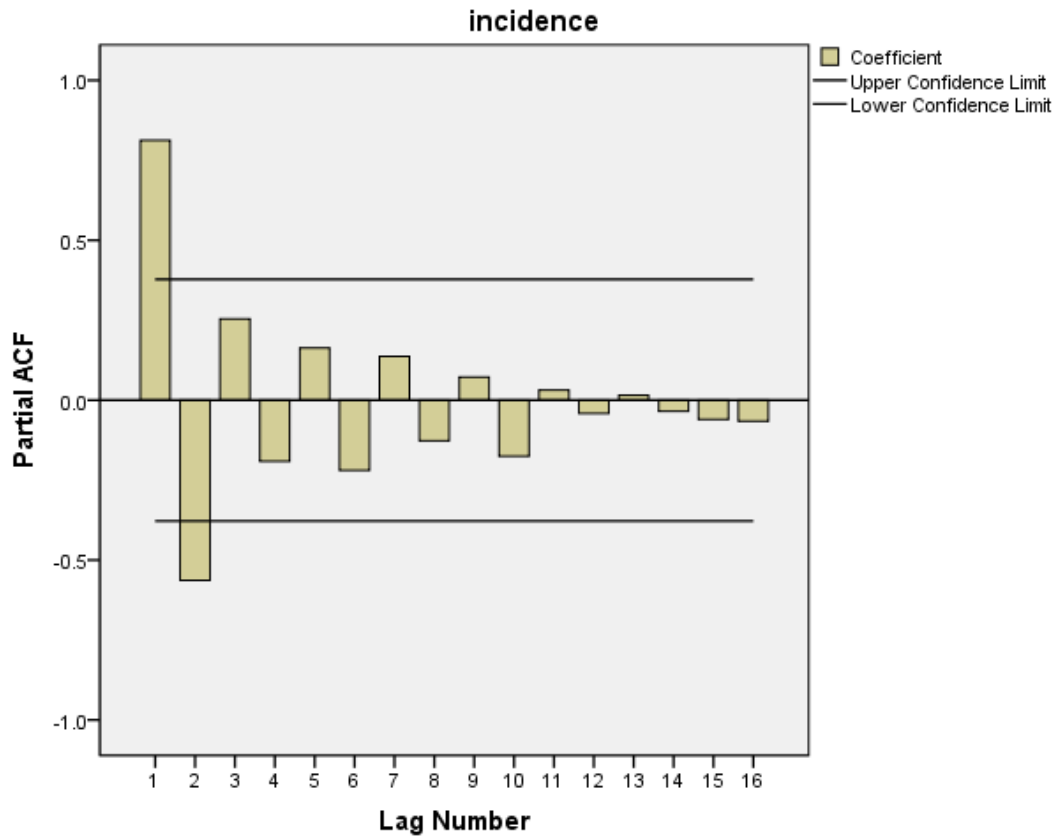

**Supplementary Fig. S5** Autocorrelation functions (ACF) and partial autocorrelation functions (PACF) of model residuals for LBP incidences in males.

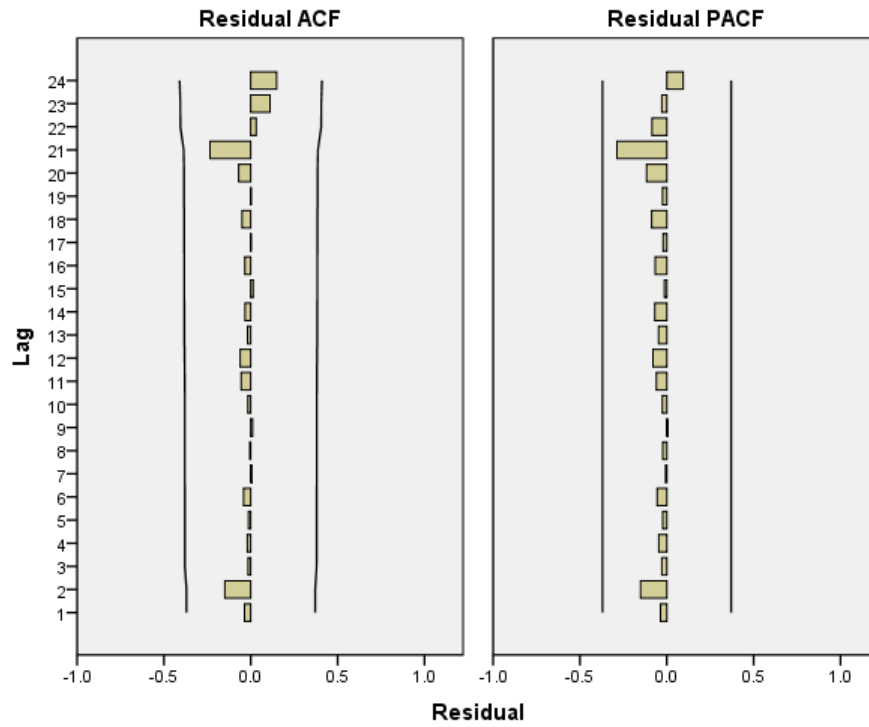

**Supplementary Fig. S6** Autocorrelation functions (ACF) and partial autocorrelation functions (PACF) of model residuals for LBP incidences in females.

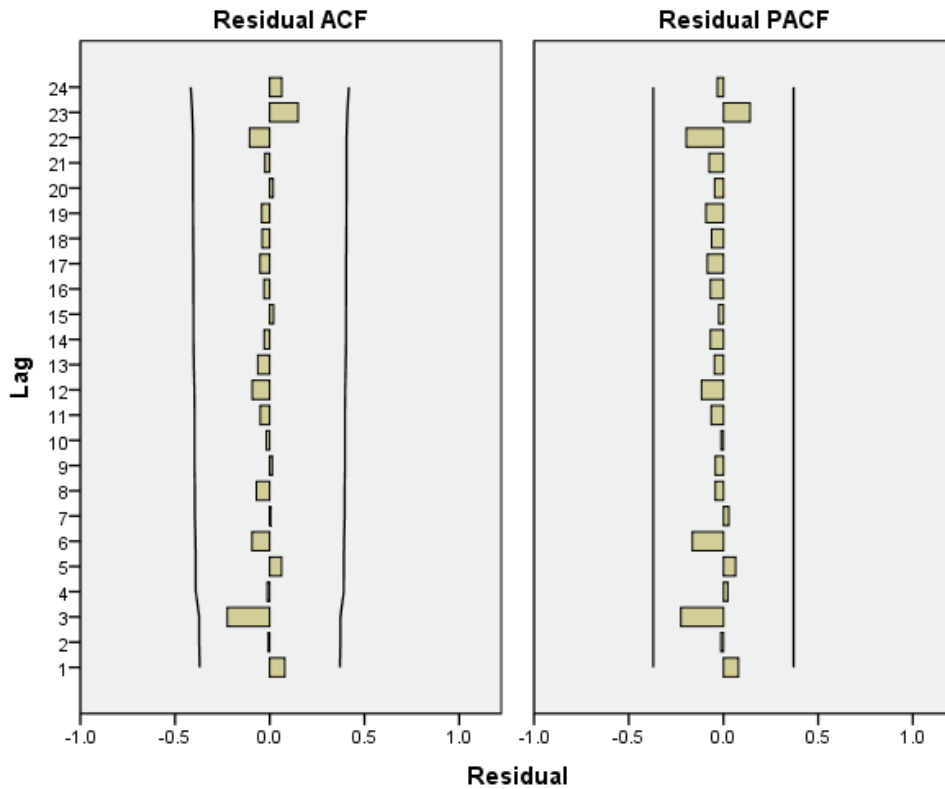

**Supplementary Fig. S7** Time series autocorrelation of NP in males.

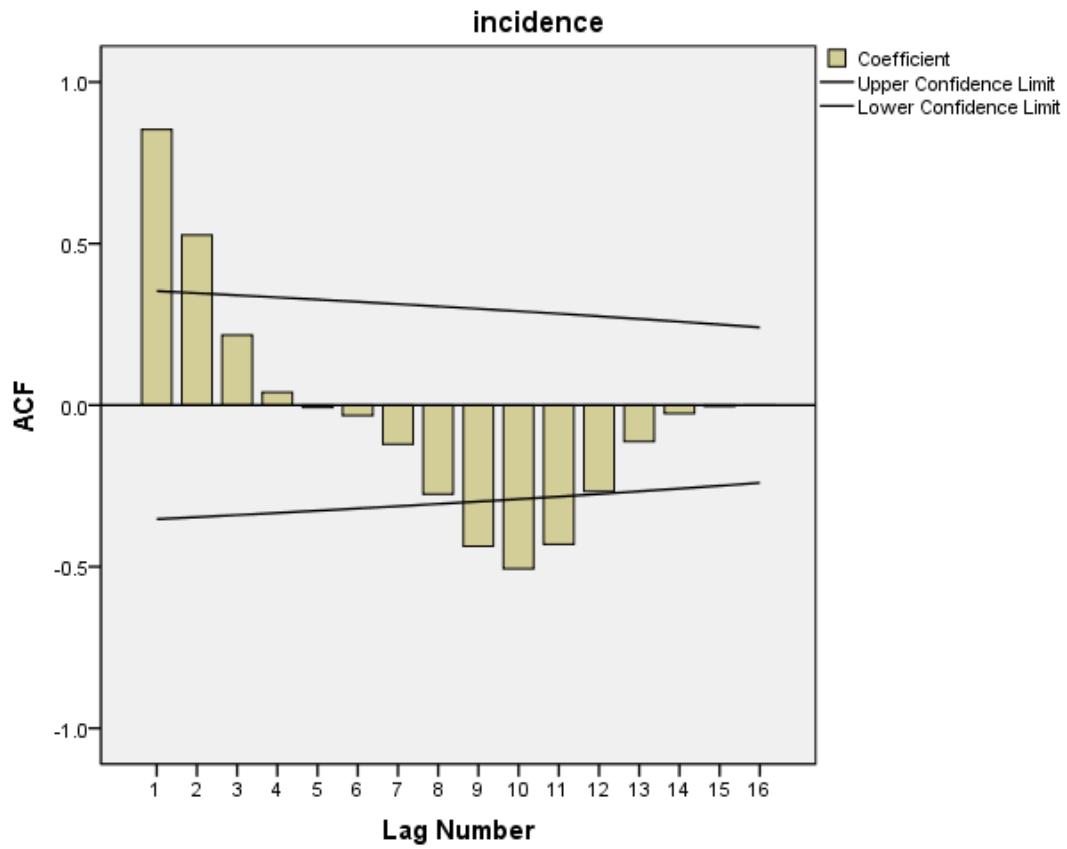

**Supplementary Fig. S8** Time series partial autocorrelation of NP in males.

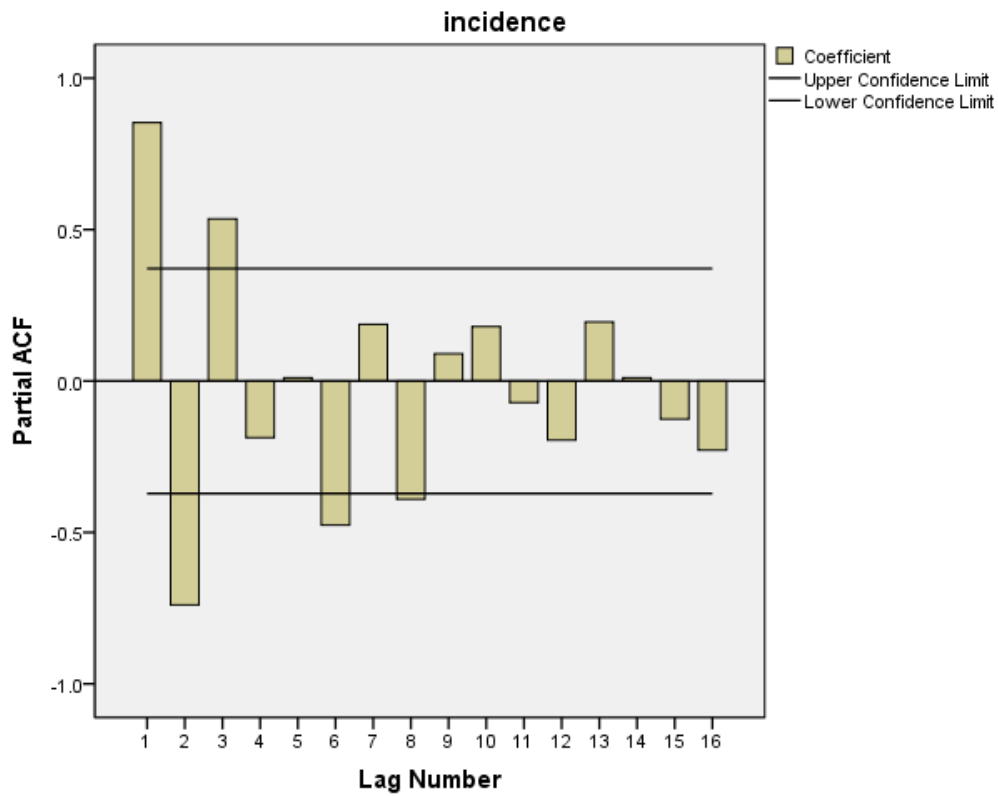

**Supplementary Fig. S9** Time series autocorrelation of NP in females.

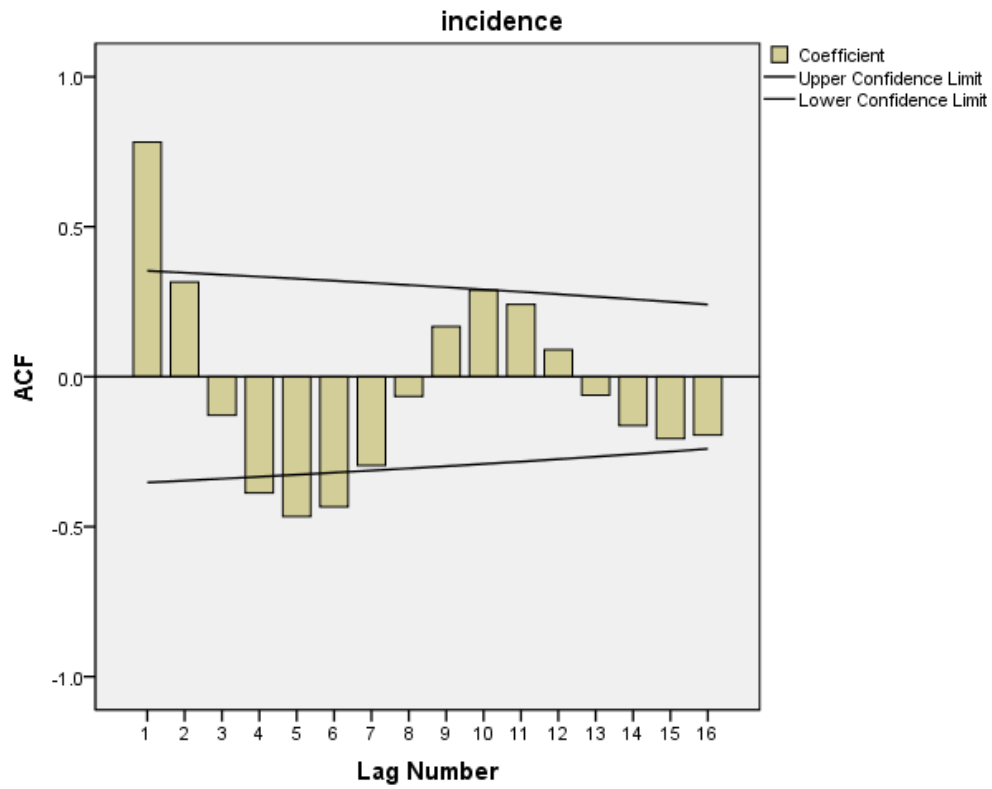

**Supplementary Fig. S10** Time series partial autocorrelation of NP in females.

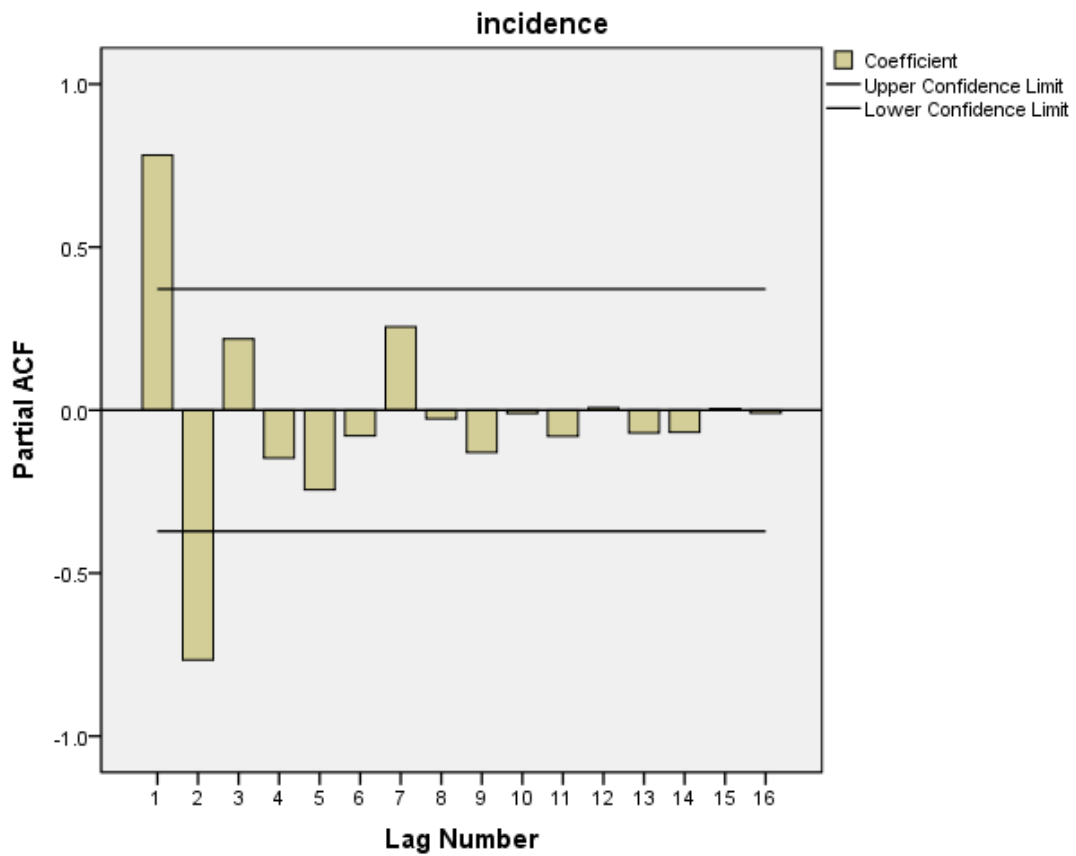

**Supplementary Fig. S11** Autocorrelation functions (ACF) and partial autocorrelation functions (PACF) of model residuals for NP incidences in males.

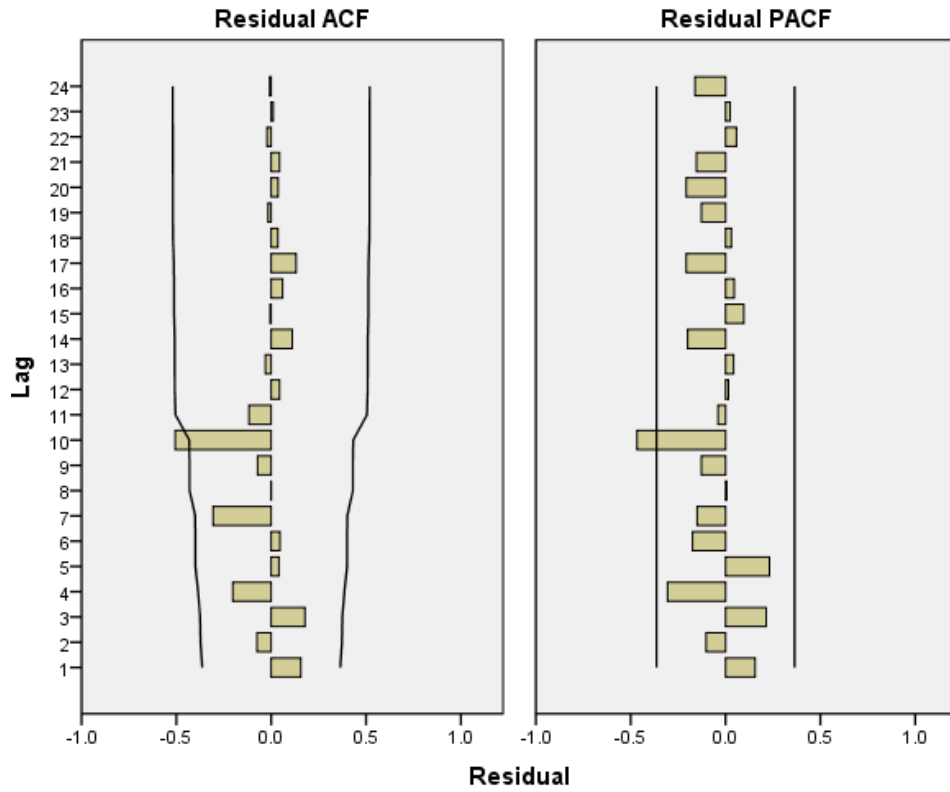

**Supplementary Fig. S12** Autocorrelation functions (ACF) and partial autocorrelation functions (PACF) of model residuals for NP incidences in females.

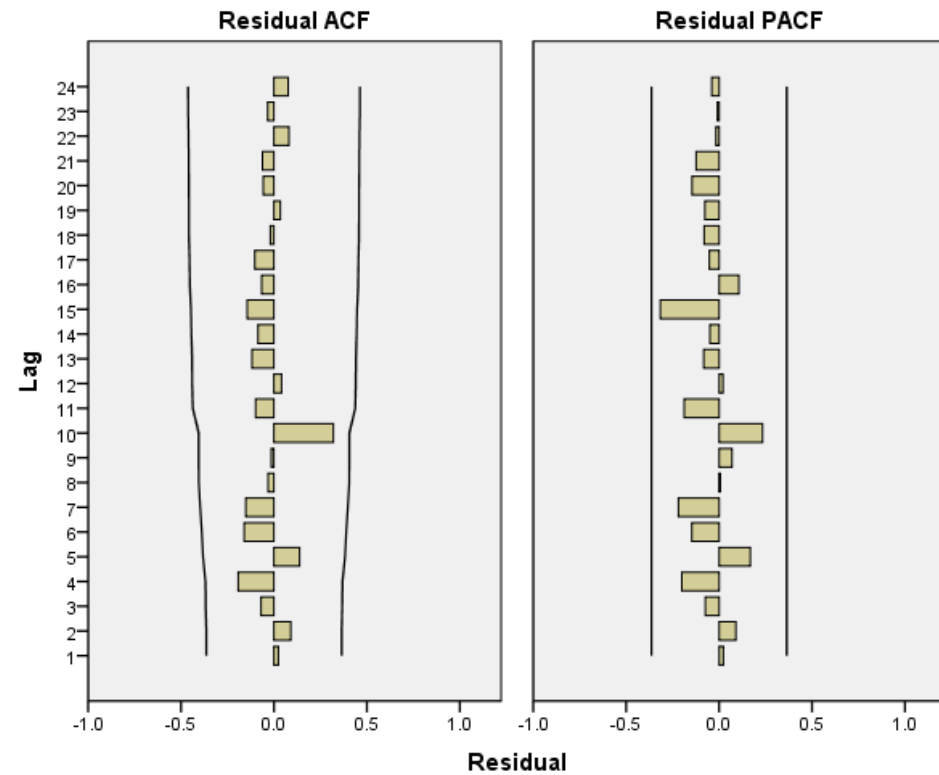



**Supplementary Table S1.** ARIMA (0,2,1) Model Parameters for LBP in males.

| Parameters |       | Estimate | Standard Error | t-statistic | p-value |
|------------|-------|----------|----------------|-------------|---------|
| Constant   |       | 1164.983 | 1499.620       | 0.777       | 0.445   |
| Difference |       | 2        |                |             |         |
| MA         | Lag 1 | -0.873   | 0.145          | -6.033      | 0.000   |
| Numerator  | Lag 0 | -0.577   | 0.748          | -0.772      | 0.447   |

**Supplementary Table S2.** ARIMA (1,2,1) Model Parameters for LBP in females.

| Parameters |       | Estimate | Standard Error | t-statistic | p-value |
|------------|-------|----------|----------------|-------------|---------|
| Constant   |       | 269.451  | 1615.499       | 1.666       | 0.109   |
| AR         | Lag 1 | 0.546    | 0.180          | 3.033       | 0.006   |
| Difference |       | 2        |                |             |         |
| MA         | Lag 1 | -0.898   | 0.179          | -5.032      | 0.000   |
| Numerator  | Lag 0 | -1.337   | 0.806          | -1.660      | 0.110   |

**Supplementary Table S3.** ARIMA (3,1,0) Model Parameters for NP in males.

| Parameters |       | Estimate | Standard Error | t-statistic | p-value |
|------------|-------|----------|----------------|-------------|---------|
| Constant   |       | -69.958  | 120.436        | -0.581      | 0.567   |
| AR         | Lag 1 | 1.804    | 0.177          | 10.197      | 0.000   |
|            | Lag 2 | -1.421   | 0.285          | -4.977      | 0.000   |
|            | Lag 3 | 0.469    | 0.178          | 2.634       | 0.015   |
| Difference |       | 1        |                |             |         |
| Numerator  | Lag 0 | 0.035    | 0.060          | 0.582       | 0.566   |

**Supplementary Table S4.** ARIMA (2,1,1) Model Parameters for NP in females.

| Parameters |       | Estimate | Standard Error | t-statistic | p-value |
|------------|-------|----------|----------------|-------------|---------|
| Constant   |       | 8.304    | 35.338         | 0.235       | 0.816   |
| AR         | Lag 1 | 1.163    | 0.171          | 6.786       | 0.000   |
|            | Lag 2 | -0.572   | 0.171          | -3.335      | 0.003   |
| Difference |       | 1        |                |             |         |
| MA         | Lag 1 | -0.840   | 0.156          | -5.395      | 0.000   |
| Numerator  | Lag 0 | -0.004   | 0.018          | -0.226      | 0.823   |
